# Supplementary material for: Oviposition behaviour of mated or unmated Cleruchoides noackae (Hymenoptera: Mymaridae)
Source: PLoS One. 2020 Oct 2;15(10):e0239285. doi: 10.1371/journal.pone.0239285 (PMC7531830; doi:10.1371/journal.pone.0239285)
Supplement: S1 Dataset — (XLSX) [file pone.0239285.s001.xlsx]

## Sheet: Planilha1
Table 1. Dataset of time period to find the first egg, other eggs, time to ovipositor insertion (minutes), and egg evaluation (seconds) by Cleruchoides noackae (Hymenoptera: Mymaridae) female on Thaumastocoris peregrinus (Hemiptera: Thaumastocoridae) eggs
Female	Replicates	First egg (m)	Other eggs (m)	Evaluation (s)	Insertion (m
Unmated	1	20	2.635	18.33	11.2
Unmated	2	44	0.838889	18.25	3.01
Unmated	3	12.5	1.02783	28.2344	3.64667
Unmated	4	7.36667	1.09259	22.916	3.56
Unmated	5	3.36	1.18571	31.5714	4.64857
Unmated	6	11.52	23.2667	29.75	2.34
Unmated	7	12.3	5.382	29.5	3.13
Unmated	8	0.8	1.24969	24.2	4.00889
Unmated	9	1.1	1.07667	21.9	3.797
Unmated	10	39.21	0.816833	20.34	11.9467
Mated	1
Mated	2	29.22	0.978333	19	5.95667
Mated	3	15	0.896667	34.8571	3.12143
Mated	4	32.48	0.5848	14.9983	3.425
Mated	5	21.01	0.805333	15.7143	4.52571
Mated	6	3.57	0.811208	24.3673	3.68273
Mated	7	29.22	0.800952	21.625	2.67375
Mated	8	16.25	1.12083	19.3333	2.95556
Mated	9	3.08	0.638148	21.2	3.59
Mated	10	4.48	1.09625	19.7778	3.31778
