# Supplementary material for: Oviposition behaviour of mated or unmated Cleruchoides noackae (Hymenoptera: Mymaridae)
Source: PLoS One. 2020 Oct 2;15(10):e0239285. doi: 10.1371/journal.pone.0239285 (PMC7531830; doi:10.1371/journal.pone.0239285)
Supplement: S2 Dataset — (XLSX) [file pone.0239285.s002.xlsx]

## Sheet: Planilha1
Table 2. Dataset of eggs inserted (%), parasitism (%), viability (%) and sex ratio of offspring of virgin and mated Cleruchoides noackae (Hymenoptera: Mymaridae) females on Thaumastocoris peregrinus (Hemiptera: Thaumastocoridae) eggs during one hour of evaluation
Female	Replicates	Eggs inserted (%)	Parasitism (%)	Viability (%)	Sex ratio of offspring
Virgin	1	30	20	66.6667	0.75
Virgin	2	40	40	100	0.6
Virgin	3	70	70	100	0.714286
Virgin	4	60	60	100	0.666667
Virgin	5	70	60	85.7143	0.75
Virgin	6	40	30	75	0.777778
Virgin	7	60	60	100	0.5
Virgin	8	90	90	100	0.666667
Virgin	9	100	90	90	0.7
Virgin	10	30	30	100	0.777778
Mated	1	0	0	0
Mated	2	30	30	100	0
Mated	3	80	80	100	0
Mated	4	60	50	83.3333	0
Mated	5	50	50	100	0
Mated	6	70	60	85.7143	0
Mated	7	90	90	100	0
Mated	8	80	80	100	0
Mated	9	90	90	100	0
Mated	10	90	90	100	0
