# Supplementary material for: Oviposition behaviour of mated or unmated Cleruchoides noackae (Hymenoptera: Mymaridae)
Source: PLoS One. 2020 Oct 2;15(10):e0239285. doi: 10.1371/journal.pone.0239285 (PMC7531830; doi:10.1371/journal.pone.0239285)
Supplement: S3 Dataset — (XLSX) [file pone.0239285.s003.xlsx]

## Sheet: Planilha1
Table 3. Dataset of frequency of the ovipositor insertion site per Cleruchoides noackae (Hymenoptera: Mymaridae) unmated or mated female on Thaumastocoris peregrinus (Hemiptera: Thaumastocoridae) egg
Female	Replicates	operculum	Side	Opposite the operculum
Unmated	1	33.33	66.66	0
Unmated	2	25	75	0
Unmated	3	37.5	50	12.5
Unmated	4	33.33	44.44	22.22
Unmated	5	28.57	42.85	28.57
Unmated	6	33.33	66.66	0
Unmated	7	16.6667	50	33.3333
Unmated	8	22.22	66.66	11.11
Unmated	9	40	60	0
Unmated	10	66.66	33.33	0
Mated	1
Mated	2	66.66	33.33	0
Mated	3	42.85	57.14	0
Mated	4	50	33.33	16.66
Mated	5	14.28	71.42	14.28
Mated	6	36.36	63.63	0
Mated	7	62.5	37.5	0
Mated	8	55.55	44.44	0
Mated	9	66.66	33.33	0
Mated	10	22.22	77.77	0
